# Supplementary material for: Diversity and evolution of ABC proteins in mycorrhiza-forming fungi
Source: PubMed Central journal article supplement (PMC4692070; doi:10.1186/s12862-015-0526-7), 2015-12-28

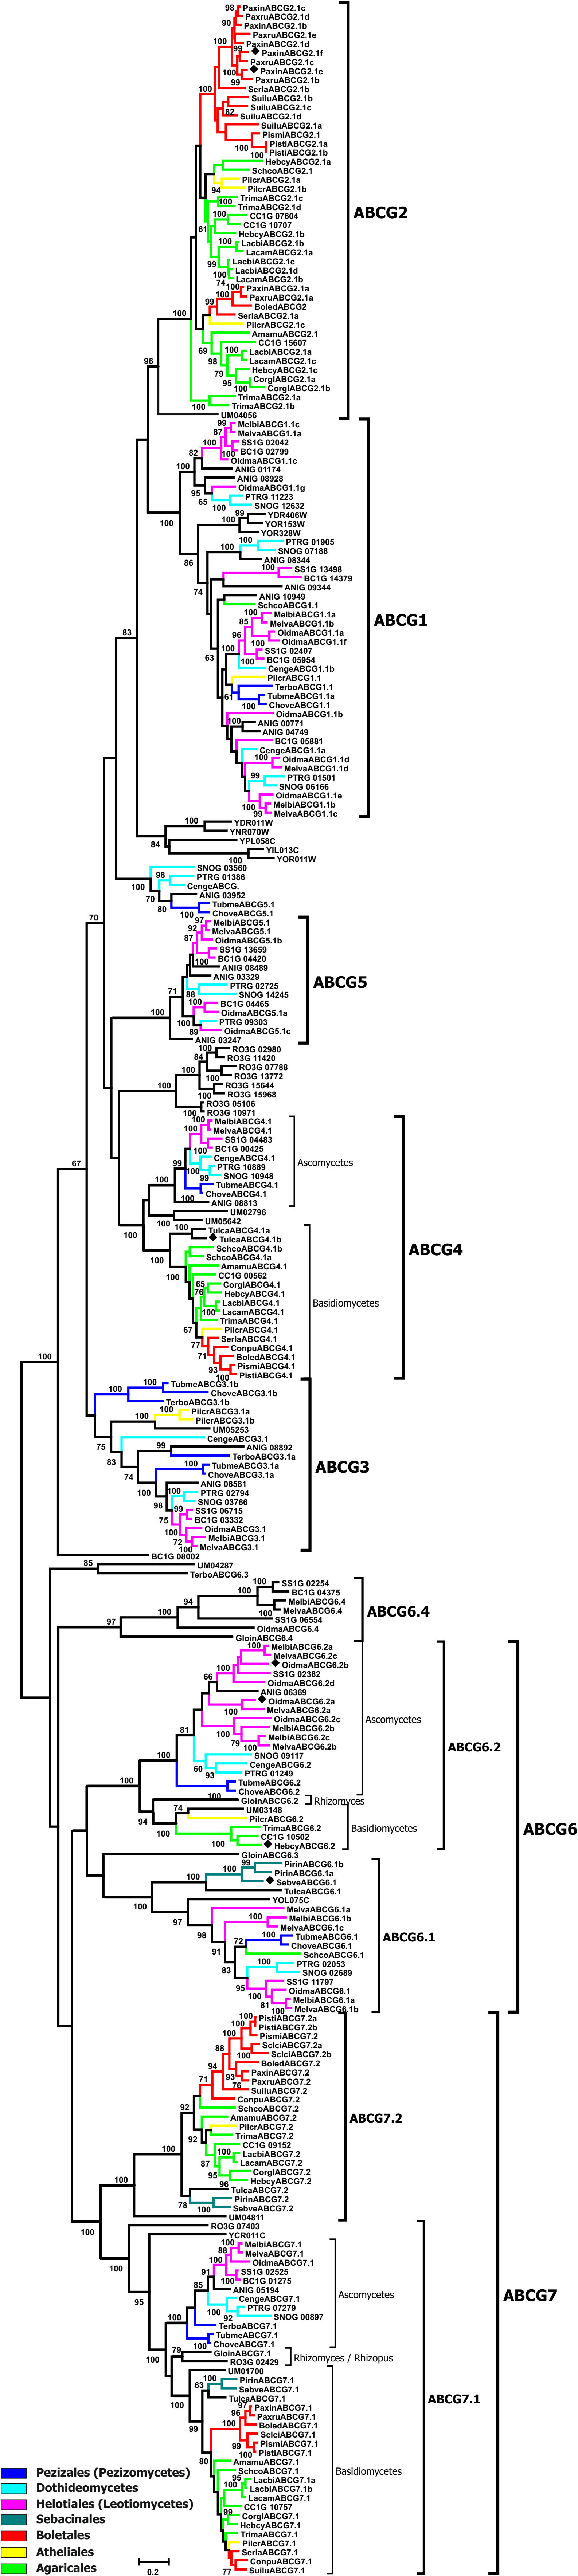

Supplement: 12862_2015_526_MOESM5_ESM.pdf [file 12862_2015_526_MOESM5_ESM.pdf]
